# Supplementary material for: Simultaneous determination of 32 antibiotics and 12 pesticides in sediment using ultrasonic-assisted extraction and high performance liquid chromatography-tandem mass spectrometry
Source: Royal Society of Chemistry journal article supplement (doi:10.1039/c4ay02895c), 2015-01-01
Supplement: c4ay02895c1.pdf [file c4ay02895c1.pdf]

1 **Simultaneous Determination of 32 Antibiotics and 12 Pesticides in Sediment Using Ultrasonic-assisted Extraction and High**  
2 **Performance Liquid Chromatography-tandem Mass Spectrometry**

3

4 Meng Chen\*, Qitong Yi, Jiajun Hong, Lemeng Zhang, Kunde Lin, Dongxing Yuan

5

6 College of the Environment and Ecology, Xiamen University, Xiamen, 361102, China

7

8 \*Corresponding author: Meng Chen; Tel.: +86-592-2183127; E-mail: mengchen@xmu.edu.cn

9

10

11

**Supplementary data**

12

13

14

15 **Table S1:** The physicochemical properties of the selected chemicals.

16 **Table S2:** Optimization results of SPE clean-up.

17 **Table S3:** Matrix effects and comparison of two quantification methods.

18 **Figure S1:** MRM chromatogram of target compounds and surrogates spiked in sediment extracts.

19

20 Table S1 The physicochemical properties of the selected chemicals

| Class               | Compound                | CAS      | Molecular Weight | Formula                                                                     | Solubility (in water, mg L <sup>-1</sup> ) | LogK <sub>ow</sub> <sup>a</sup> | pK <sub>a</sub> <sup>b</sup>           | Structure                                                                             |
|---------------------|-------------------------|----------|------------------|-----------------------------------------------------------------------------|--------------------------------------------|---------------------------------|----------------------------------------|---------------------------------------------------------------------------------------|
| <b>Sulfonamides</b> | Sulfamethoxazole (SMOZ) | 723-46-6 | 253.28           | C <sub>10</sub> H <sub>11</sub> N <sub>3</sub> O <sub>3</sub> S             | 610 <sup>c</sup>                           | 0.89 <sup>c</sup>               | 1.85<br>5.6<br>5.9 <sup>e</sup>        | 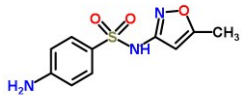   |
|                     | Sulfamethizole (SMTZ)   | 144-82-1 | 270.34           | C <sub>9</sub> H <sub>10</sub> N <sub>4</sub> O <sub>2</sub> S <sub>2</sub> | 1,050 <sup>c</sup>                         | 0.54 <sup>c</sup>               | 1.86<br>5.29 <sup>f</sup>              |    |
|                     | Sulfapyridine (SPD)     | 144-83-2 | 249.29           | C <sub>11</sub> H <sub>11</sub> N <sub>3</sub> O <sub>2</sub> S             | 268 <sup>c</sup>                           | 0.35 <sup>c</sup>               | 2.58 <sup>e</sup><br>8.43 <sup>c</sup> |   |
|                     | Sulfathiazole (STZ)     | 72-14-0  | 255.32           | C <sub>9</sub> H <sub>9</sub> N <sub>3</sub> O <sub>2</sub> S <sub>2</sub>  | 373 <sup>c</sup>                           | 0.05 <sup>c</sup>               | 2.0 <sup>e</sup><br>7.2 <sup>c</sup>   |  |

22 Table S1 (Continued)

| Class               | Compound                    | CAS      | Molecular Weight | Formula                                                          | Solubility (in water, mg L <sup>-1</sup> ) | LogK <sub>ow</sub> | pK <sub>a</sub>           | Structure                                                                             |
|---------------------|-----------------------------|----------|------------------|------------------------------------------------------------------|--------------------------------------------|--------------------|---------------------------|---------------------------------------------------------------------------------------|
| <b>Sulfonamides</b> | Sulfaquinoxaline (SQA)      | 59-40-5  | 300.34           | C <sub>14</sub> H <sub>12</sub> N <sub>4</sub> O <sub>2</sub> S  | 120 <sup>g</sup>                           | 1.68 <sup>c</sup>  | 2.3<br>6.0 <sup>g</sup>   | 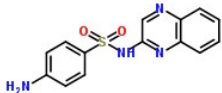   |
|                     | Sulfachlorpyridazine (SCPZ) | 80-32-0  | 284.73           | C <sub>10</sub> H <sub>9</sub> ClN <sub>4</sub> O <sub>2</sub> S | 7,000 <sup>c</sup>                         | 0.310 <sup>c</sup> | 1.87<br>5.45 <sup>e</sup> |    |
|                     | Sulfamerazine (SMZ)         | 127-79-7 | 264.31           | C <sub>11</sub> H <sub>12</sub> N <sub>4</sub> O <sub>2</sub> S  | 202 <sup>c</sup>                           | 0.14 <sup>c</sup>  | 2.06<br>6.90 <sup>f</sup> |    |
|                     | Sulfadimethoxine (SDMX)     | 122-11-2 | 310.33           | C <sub>12</sub> H <sub>14</sub> N <sub>4</sub> O <sub>4</sub> S  | 343 <sup>c</sup>                           | 1.63 <sup>c</sup>  | 2.13<br>6.08 <sup>e</sup> |  |

24 Table S1 (Continued)

| Class               | Compound                  | CAS       | Molecular Weight | Formula                                                         | Solubility (in water, mg L <sup>-1</sup> ) | LogK <sub>ow</sub> | pK <sub>a</sub>                       | Structure                                                                             |
|---------------------|---------------------------|-----------|------------------|-----------------------------------------------------------------|--------------------------------------------|--------------------|---------------------------------------|---------------------------------------------------------------------------------------|
| <b>Sulfonamides</b> | Sulfamonomethoxine (SMMX) | 1220-83-3 | 280.31           | C <sub>11</sub> H <sub>12</sub> N <sub>4</sub> O <sub>3</sub> S | 4,030 <sup>c</sup>                         | 0.7 <sup>c</sup>   | 2.0<br>6.0 <sup>h</sup>               | 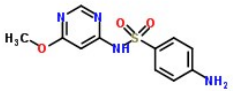   |
|                     | Sulfameter (SMT)          | 651-06-9  | 280.31           | C <sub>11</sub> H <sub>12</sub> N <sub>4</sub> O <sub>3</sub> S | 730 <sup>c</sup>                           | 0.41 <sup>c</sup>  | 1.84<br>6.69 <sup>i</sup>             |    |
|                     | Sulfamethazine (SMA)      | 57-68-1   | 278.33           | C <sub>12</sub> H <sub>14</sub> N <sub>4</sub> O <sub>2</sub> S | 1,500 <sup>c</sup>                         | 0.89 <sup>c</sup>  | 1.6<br>7.4 <sup>g</sup>               |    |
|                     | Sulfadiazine (SDZ)        | 68-35-9   | 250.28           | C <sub>10</sub> H <sub>10</sub> N <sub>4</sub> O <sub>2</sub> S | 77 <sup>c</sup>                            | -0.09 <sup>c</sup> | 1.6 <sup>e</sup><br>6.36 <sup>c</sup> |  |

26 Table S1 (Continued)

| Class               | Compound                      | CAS      | Molecular Weight | Formula                                                         | Solubility (in water, mg L <sup>-1</sup> ) | LogK <sub>ow</sub> | pK <sub>a</sub>           | Structure                                                                             |
|---------------------|-------------------------------|----------|------------------|-----------------------------------------------------------------|--------------------------------------------|--------------------|---------------------------|---------------------------------------------------------------------------------------|
| <b>Sulfonamides</b> | Sulfisomidine (SMD)           | 515-64-0 | 278.33           | C <sub>12</sub> H <sub>14</sub> N <sub>4</sub> O <sub>2</sub> S | 1,620 <sup>c</sup>                         | -0.33 <sup>c</sup> | - <sup>k</sup>            | 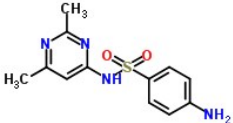   |
|                     | Sulfisoxazole (SXZ)           | 127-69-5 | 267.31           | C <sub>11</sub> H <sub>13</sub> N <sub>3</sub> O <sub>3</sub> S | 300 <sup>c</sup>                           | 1.01 <sup>c</sup>  | 1.60<br>4.83 <sup>i</sup> |    |
|                     | Sulfanitran (SNT)             | 122-16-7 | 335.34           | C <sub>14</sub> H <sub>13</sub> N <sub>3</sub> O <sub>5</sub> S | 36.6 <sup>d</sup>                          | 2.26 <sup>c</sup>  | -                         |   |
|                     | Sulfamethoxypyridazine (SMPZ) | 80-35-3  | 280.31           | C <sub>11</sub> H <sub>12</sub> N <sub>4</sub> O <sub>3</sub> S | 147 <sup>c</sup>                           | 0.32 <sup>c</sup>  | 2.08<br>7.19 <sup>i</sup> |  |

28 Table S1 (Continued)

| Class             | Compound            | CAS        | Molecular Weight | Formula                                                        | Solubility (in water, mg L <sup>-1</sup> ) | LogK <sub>ow</sub> | pK <sub>a</sub>                            | Structure                                                                             |
|-------------------|---------------------|------------|------------------|----------------------------------------------------------------|--------------------------------------------|--------------------|--------------------------------------------|---------------------------------------------------------------------------------------|
| <b>Quinolones</b> | Ciprofloxacin (CIP) | 85721-33-1 | 331.35           | C <sub>17</sub> H <sub>18</sub> FN <sub>3</sub> O <sub>3</sub> | 30,000 <sup>c</sup>                        | 0.28 <sup>c</sup>  | 3.01<br>6.14<br>8.70<br>10.58 <sup>e</sup> | 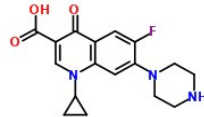   |
|                   | Norfloxacin (NOR)   | 70458-96-7 | 319.33           | C <sub>16</sub> H <sub>18</sub> FN <sub>3</sub> O <sub>3</sub> | 178,000 <sup>c</sup>                       | -1.03 <sup>c</sup> | 3.11<br>6.10<br>8.6<br>10.56 <sup>e</sup>  |    |
|                   | Enrofloxacin (ENR)  | 93106-60-6 | 359.40           | C <sub>19</sub> H <sub>22</sub> FN <sub>3</sub> O <sub>3</sub> | 3,400 <sup>c</sup>                         | 0.70 <sup>c</sup>  | 3.85<br>6.19<br>7.59<br>9.86 <sup>e</sup>  |    |
|                   | Ofloxacin (OFX)     | 82419-36-1 | 361.37           | C <sub>18</sub> H <sub>20</sub> FN <sub>3</sub> O <sub>4</sub> | 28,300 <sup>c</sup>                        | -0.39 <sup>c</sup> | 5.97<br>8.28 <sup>e</sup>                  |  |

30 Table S1 (Continued)

| Class             | Compound            | CAS         | Molecular Weight | Formula                                                                      | Solubility (in water, mg L <sup>-1</sup> ) | LogK <sub>ow</sub> | pK <sub>a</sub>           | Structure                                                                             |
|-------------------|---------------------|-------------|------------------|------------------------------------------------------------------------------|--------------------------------------------|--------------------|---------------------------|---------------------------------------------------------------------------------------|
| <b>Quinolones</b> | Danofloxacin (DFX)  | 112398-08-0 | 357.38           | C <sub>19</sub> H <sub>20</sub> FN <sub>3</sub> O <sub>3</sub>               | 5,818 <sup>d</sup>                         | 0.44 <sup>d</sup>  | 2.73<br>9.13 <sup>e</sup> | 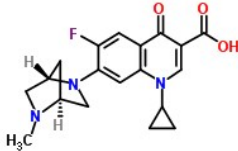   |
|                   | Flumequine (FLQ)    | 42835-25-6  | 261.25           | C <sub>14</sub> H <sub>12</sub> FNO <sub>3</sub>                             | 2,190 <sup>c</sup>                         | 1.6 <sup>c</sup>   | 6.29 <sup>j</sup>         |    |
|                   | Marbofloxacin (MXF) | 11550-35-1  | 362.36           | C <sub>17</sub> H <sub>19</sub> FN <sub>4</sub> O <sub>4</sub>               | 1,000,000 <sup>c</sup>                     | -2.92 <sup>d</sup> | 5.69<br>8.02 <sup>j</sup> |    |
|                   | Sarafloxacin (SFX)  | 98105-99-8  | 385.37           | C <sub>20</sub> H <sub>17</sub> F <sub>2</sub> N <sub>3</sub> O <sub>3</sub> | 1,139 <sup>d</sup>                         | 1.07 <sup>c</sup>  | 6.0<br>8.6 <sup>e</sup>   |  |

| Class             | Compound           | CAS         | Molecular Weight | Formula                                                        | Solubility (in water, mg L <sup>-1</sup> ) | LogK <sub>ow</sub> | pK <sub>a</sub>           | Structure                                                                             |
|-------------------|--------------------|-------------|------------------|----------------------------------------------------------------|--------------------------------------------|--------------------|---------------------------|---------------------------------------------------------------------------------------|
| <b>Quinolones</b> | Oxolinic Acid (OA) | 14698-29-4  | 261.23           | C <sub>13</sub> H <sub>11</sub> NO <sub>5</sub>                | 3.2 <sup>c</sup>                           | 0.94 <sup>c</sup>  | 6.87 <sup>c</sup>         | 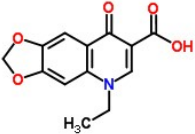   |
| <b>Macrolides</b> | Erythromycin (ETM) | 114-07-8    | 733.93           | C <sub>37</sub> H <sub>67</sub> NO <sub>13</sub>               | 1.44 <sup>c</sup>                          | 3.06 <sup>c</sup>  | 8.88 <sup>c</sup>         |    |
|                   | Tylosin (TLS)      | 1401-69-0   | 916.10           | C <sub>46</sub> H <sub>77</sub> NO <sub>17</sub>               | 5 <sup>c</sup>                             | 1.63 <sup>c</sup>  | 3.31<br>7.73 <sup>f</sup> |   |
|                   | Tilmicosin (TMS)   | 108050-54-0 | 869.14           | C <sub>46</sub> H <sub>80</sub> N <sub>2</sub> O <sub>13</sub> | 0.015 <sup>c</sup>                         | 3.8 <sup>c</sup>   | 8.18 <sup>c</sup>         |  |



| Class                | Compound                | CAS      | Molecular Weight | Formula                                                         | Solubility (in water, mg L <sup>-1</sup> ) | LogK <sub>ow</sub> | pK <sub>a</sub>                               | Structure                                                                             |
|----------------------|-------------------------|----------|------------------|-----------------------------------------------------------------|--------------------------------------------|--------------------|-----------------------------------------------|---------------------------------------------------------------------------------------|
| <b>Tetracyclines</b> | Oxytetracycline (OTC)   | 79-57-2  | 460.44           | C <sub>22</sub> H <sub>24</sub> N <sub>2</sub> O <sub>9</sub>   | 313 <sup>c</sup>                           | -0.9 <sup>c</sup>  | 3.22<br>7.46<br>8.94 <sup>e</sup>             | 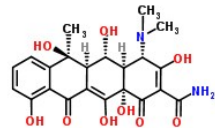   |
|                      | Chlortetracycline (CTC) | 57-62-5  | 478.88           | C <sub>22</sub> H <sub>23</sub> ClN <sub>2</sub> O <sub>8</sub> | 630 <sup>c</sup>                           | -0.62 <sup>c</sup> | 3.3 <sup>c</sup><br>7.55<br>9.33 <sup>e</sup> |    |
|                      | Tetracycline (TCC)      | 60-54-8  | 444.44           | C <sub>22</sub> H <sub>24</sub> N <sub>2</sub> O <sub>8</sub>   | 231 <sup>c</sup>                           | -1.30 <sup>c</sup> | 3.3 <sup>c</sup><br>7.78<br>9.58 <sup>e</sup> |   |
|                      | Doxycycline (DCC)       | 564-25-0 | 444.44           | C <sub>22</sub> H <sub>24</sub> N <sub>2</sub> O <sub>8</sub>   | 630 <sup>c</sup>                           | -0.02 <sup>c</sup> | 3.02<br>7.97<br>9.15 <sup>e</sup>             |  |

| Class         | Compound                | CAS         | Molecular Weight | Formula                                                               | Solubility (in water, mg L <sup>-1</sup> ) | LogK <sub>ow</sub> | pK <sub>a</sub>  | Structure                                                                             |
|---------------|-------------------------|-------------|------------------|-----------------------------------------------------------------------|--------------------------------------------|--------------------|------------------|---------------------------------------------------------------------------------------|
| <b>Azoles</b> | Prochloraz<br>(PCA)     | 67747-09-5  | 376.67           | C <sub>15</sub> H <sub>16</sub> Cl <sub>3</sub> N <sub>3</sub> O<br>2 | 34 <sup>c</sup>                            | 4.1 <sup>c</sup>   | 3.8 <sup>c</sup> | 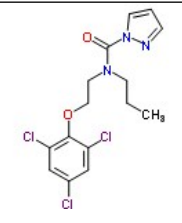   |
|               | Difenoconazole<br>(DCZ) | 119446-68-3 | 406.27           | C <sub>19</sub> H <sub>17</sub> Cl <sub>2</sub> N <sub>3</sub> O<br>3 | 15 <sup>c</sup>                            | 4.3 <sup>c</sup>   | -                |    |
|               | Triadimefon<br>(TMF)    | 43121-43-3  | 293.75           | C <sub>14</sub> H <sub>16</sub> ClN <sub>3</sub> O <sub>2</sub>       | 71.5 <sup>c</sup>                          | 2.77 <sup>c</sup>  | -                |   |
|               | Triadimenol<br>(TMN)    | 55219-65-3  | 295.77           | C <sub>14</sub> H <sub>18</sub> ClN <sub>3</sub> O <sub>2</sub>       | 120 <sup>c</sup>                           | 2.9 <sup>c</sup>   | -                |  |

| Class         | Compound            | CAS        | Molecular Weight | Formula                                                               | Solubility (in water, mg L <sup>-1</sup> ) | LogK <sub>ow</sub> | pK <sub>a</sub>   | Structure                                                                             |
|---------------|---------------------|------------|------------------|-----------------------------------------------------------------------|--------------------------------------------|--------------------|-------------------|---------------------------------------------------------------------------------------|
| <b>Azoles</b> | Paclobutrazol (PBZ) | 76738-62-0 | 293.79           | C <sub>15</sub> H <sub>20</sub> ClN <sub>3</sub> O                    | 26 <sup>c</sup>                            | 3.2 <sup>c</sup>   | -                 | 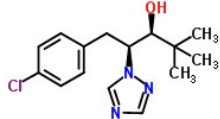   |
|               | Myclobutanil (MCB)  | 88671-89-0 | 288.78           | C <sub>15</sub> H <sub>17</sub> ClN <sub>4</sub>                      | 142 <sup>c</sup>                           | 2.94 <sup>c</sup>  | -                 |    |
|               | Flusilazole (FSZ)   | 85509-19-9 | 315.40           | C <sub>16</sub> H <sub>15</sub> F <sub>2</sub> N <sub>3</sub> Si      | 54 <sup>c</sup>                            | 3.7 <sup>c</sup>   | 2.5 <sup>c</sup>  |   |
|               | Propiconazole (PCZ) | 60207-90-1 | 342.22           | C <sub>15</sub> H <sub>17</sub> Cl <sub>2</sub> N <sub>3</sub> O<br>2 | 110 <sup>c</sup>                           | 3.72 <sup>c</sup>  | 1.09 <sup>c</sup> |  |



41 Table S1 (Continued)

| Class                   | Compound              | CAS         | Molecular Weight | Formula                                                        | Solubility (in water, mg L <sup>-1</sup> ) | LogK <sub>ow</sub> | pK <sub>a</sub>  | Structure                                                                             |
|-------------------------|-----------------------|-------------|------------------|----------------------------------------------------------------|--------------------------------------------|--------------------|------------------|---------------------------------------------------------------------------------------|
| <b>Azoles</b>           | Tebuconazole<br>(TCZ) | 107534-96-3 | 307.82           | C <sub>16</sub> H <sub>23</sub> ClN <sub>3</sub> O             | 36 <sup>c</sup>                            | 3.7 <sup>c</sup>   | -                | 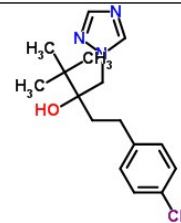   |
| <b>Neonicotinoids</b>   | Imidacloprid<br>(ICP) | 138261-41-3 | 255.66           | C <sub>9</sub> H <sub>10</sub> ClN <sub>5</sub> O <sub>2</sub> | 610 <sup>c</sup>                           | 0.57 <sup>c</sup>  | -                |    |
|                         | Acetamiprid<br>(AMP)  | 135410-20-7 | 222.68           | C <sub>10</sub> H <sub>11</sub> ClN <sub>4</sub>               | 4,200 <sup>c</sup>                         | 2.55 <sup>d</sup>  | 0.7 <sup>c</sup> |    |
| <b>Organophosphorus</b> | Dimethoate<br>(DMA)   | 60-51-5     | 229.26           | C <sub>5</sub> H <sub>12</sub> NO <sub>3</sub> PS <sub>2</sub> | 25,000 <sup>c</sup>                        | 0.78 <sup>c</sup>  | -                |  |

42 <sup>a</sup> K<sub>ow</sub>: the octanol-water partition coefficient, <sup>b</sup> pK<sub>a</sub>: acidity constant, <sup>c</sup> U.S. National Medicine ChemIDPlus Advanced. <http://chem.sis.nlm.nih.gov/chemidplus/> (November 10,  
43 2014), <sup>d</sup> U.K. Royal Society of Chemistry-ChemSpider Search and Share Chemistry. <http://www.chemspider.com/>, <sup>e</sup> Reference <sup>1</sup>, <sup>f</sup> Reference<sup>2</sup>, <sup>g</sup> Reference<sup>3</sup>, <sup>h</sup> Reference<sup>4</sup>, <sup>i</sup> Reference<sup>5</sup>,  
44 <sup>j</sup> Reference<sup>6</sup>, <sup>k</sup> Not available

Table S2 Optimization results of SPE clean-up (%)

| Compound                  | Selection of SPE cartridge |         | Dilution volumes |              |        |        | Added of Na <sub>2</sub> EDTA |       |       |       |
|---------------------------|----------------------------|---------|------------------|--------------|--------|--------|-------------------------------|-------|-------|-------|
|                           | GCB+HLB                    | SAX+HLB | 200 mL           | 250 mL       | 300 mL | 350 mL | 0 g                           | 0.2 g | 0.4 g | 0.6 g |
| <i>SDZ-D4<sup>a</sup></i> | 89.0                       | 71.8    | 55.1             | 63.4         | 68.9   | 85.1   | 83.2                          | 96.9  | 96.3  | 89.3  |
| <i>STZ-D4</i>             | 83.5                       | 111.6   | 71.3             | 72.0         | 73.1   | 85.9   | 74.6                          | 95.8  | 86.4  | 86.8  |
| <i>NOR-D5</i>             | <b>0.0<sup>b</sup></b>     | 42.4    | 78.3             | 114.0        | 94.6   | 104.3  | 89.5                          | 81.4  | 90.9  | 92.4  |
| <i>SCZ</i>                | - <sup>c</sup>             | -       | 92.8             | 94.9         | 85.4   | 101.0  | 91.7                          | 96.5  | 98.0  | 94.0  |
| <i>SMOZ</i>               | 106.6                      | 87.7    | 87.7             | 88.4         | 79.9   | 94.4   | 78.3                          | 96.0  | 93.5  | 92.7  |
| <i>SMTZ</i>               | 82.2                       | 99.4    | 84.8             | 81.6         | 77.3   | 90.6   | 71.5                          | 94.5  | 80.9  | 87.6  |
| <i>SPD</i>                | 95.8                       | 105.5   | 66.4             | 77.4         | 71.8   | 92.7   | 74.7                          | 92.7  | 99.7  | 91.1  |
| <i>STZ</i>                | 90.7                       | 92.3    | 70.2             | 83.2         | 71.8   | 90.3   | 74.2                          | 94.6  | 87.7  | 86.5  |
| <i>SQA</i>                | 60.5                       | 80.7    | 89.2             | 84.5         | 77.1   | 90.7   | 61.4                          | 109.7 | 72.6  | 90.0  |
| <i>SCPZ</i>               | -                          | -       | 89.6             | 88.1         | 79.9   | 92.6   | 75.5                          | 98.0  | 93.6  | 92.7  |
| <i>SMZ</i>                | 92.4                       | 107.3   | 77.7             | 89.1         | 73.4   | 93.5   | 80.5                          | 92.5  | 93.2  | 91.1  |
| <i>SDMX</i>               | 92.3                       | 97.7    | 89.5             | 84.3         | 78.6   | 94.9   | 71.7                          | 98.9  | 83.7  | 90.1  |
| <i>SMMX</i>               | 96.2                       | 95.9    | 90.1             | 88.9         | 81.2   | 95.4   | 76.4                          | 96.3  | 94.8  | 92.6  |
| <i>SMT</i>                | 96.0                       | 105.6   | 87.1             | 88.3         | 70.6   | 91.0   | 77.8                          | 89.2  | 82.0  | 87.5  |
| <i>SMA</i>                | 95.5                       | 109.8   | 82.8             | 86.5         | 74.7   | 95.4   | 78.1                          | 92.6  | 96.4  | 90.8  |
| <i>SDZ</i>                | 95.0                       | 73.5    | 58.2             | 67.9         | 69.5   | 83.6   | 83.3                          | 95.7  | 92.4  | 87.0  |
| <i>SMD</i>                | 98.1                       | 40.4    | <b>33.0</b>      | <b>35.0</b>  | 41.8   | 60.4   | 69.8                          | 75.1  | 80.1  | 72.8  |
| <i>SXZ</i>                | 80.1                       | 83.1    | 85.6             | 76.7         | 79.6   | 97.2   | 77.3                          | 96.3  | 91.1  | 93.5  |
| <i>SNT</i>                | 46.4                       | 53.3    | 97.4             | 108.6        | 90.4   | 103.9  | 92.9                          | 93.9  | 93.9  | 96.5  |
| <i>SMPZ</i>               | 96.0                       | 105.6   | 87.8             | 88.3         | 70.5   | 91.0   | 77.2                          | 89.6  | 80.4  | 87.6  |
| <i>CIP</i>                | <b>0.0</b>                 | 59.8    | 84.5             | 112.3        | 95.6   | 104.2  | 89.4                          | 84.7  | 76.7  | 92.3  |
| <i>NOR</i>                | <b>0.0</b>                 | 46.3    | 77.2             | 105.4        | 94.9   | 94.8   | 89.8                          | 85.2  | 85.8  | 88.0  |
| <i>ENR</i>                | <b>0.0</b>                 | 71.0    | 99.2             | 117.6        | 87.3   | 103.4  | 95.7                          | 83.7  | 91.9  | 96.4  |
| <i>OFX</i>                | <b>0.0</b>                 | 45.1    | 77.6             | 101.9        | 89.5   | 100.6  | 92.6                          | 92.9  | 90.2  | 99.0  |
| <i>DFX</i>                | <b>0.0</b>                 | 57.5    | 90.8             | <b>135.1</b> | 81.5   | 101.0  | 82.2                          | 82.7  | 86.5  | 99.0  |
| <i>FLQ</i>                | <b>0.0</b>                 | 113.1   | 105.2            | 117.6        | 99.5   | 105.8  | 86.9                          | 89.9  | 104.9 | 97.4  |

Table S2 (Continued)

| Compound | Selection of SPE cartridge |             | Dilution volumes |        |             |        | Added of Na <sub>2</sub> EDTA |       |       |       |
|----------|----------------------------|-------------|------------------|--------|-------------|--------|-------------------------------|-------|-------|-------|
|          | GCB+HLB                    | SAX+HLB     | 200 mL           | 250 mL | 300 mL      | 350 mL | 0 g                           | 0.2 g | 0.4 g | 0.6 g |
| MFX      | <b>0.0</b>                 | <b>23.3</b> | 56.7             | 88.1   | 72.7        | 94.5   | 101.8                         | 90.2  | 88.3  | 98.1  |
| SFX      | <b>0.0</b>                 | 96.1        | 88.7             | 107.0  | 89.1        | 100.0  | 82.7                          | 82.6  | 82.5  | 92.7  |
| OA       | <b>0.0</b>                 | 115.7       | 104.1            | 133.7  | 99.7        | 110.7  | 83.3                          | 85.3  | 94.2  | 100.2 |
| ETM      | -                          | -           | 74.0             | 84.7   | 77.0        | 84.8   | 94.1                          | 99.0  | 103.9 | 103.8 |
| TLS      | -                          | -           | * <sup>d</sup>   | *      | *           | *      | 87.0                          | 97.3  | 102.8 | 91.7  |
| TMS      | -                          | -           | *                | *      | *           | *      | 96.3                          | 97.0  | 91.4  | 100.9 |
| OTC      | -                          | -           | 47.3             | 59.9   | 75.0        | 84.3   | 84.8                          | 79.7  | 104.7 | 87.4  |
| CTC      | -                          | -           | 96.7             | 93.7   | 111.4       | 116.2  | 89.2                          | 82.3  | 101.9 | 93.3  |
| TCC      | -                          | -           | 48.8             | 59.1   | 79.2        | 92.3   | 91.2                          | 83.1  | 89.9  | 88.4  |
| DCC      | -                          | -           | 54.4             | 67.0   | 83.9        | 97.9   | 88.1                          | 83.9  | 114.3 | 86.4  |
| PCA      | 101.5                      | 99.4        | 82.2             | 82.9   | 78.5        | 93.1   | 81.6                          | 84.5  | 86.6  | 85.1  |
| DCZ      | 71.1                       | 80.7        | 49.8             | 51.5   | <b>39.0</b> | 59.4   | 60.7                          | 70.7  | 45.6  | 54.0  |
| TMF      | -                          | -           | 93.4             | 88.6   | 87.0        | 103.5  | 96.2                          | 90.5  | 93.7  | 98.5  |
| TMN      | -                          | -           | 99.4             | 102.8  | 93.4        | 103.8  | 99.9                          | 87.3  | 104.3 | 99.4  |
| PBZ      | -                          | -           | 93.4             | 95.3   | 90.0        | 104.6  | 94.3                          | 93.4  | 100.6 | 101.7 |
| MCB      | -                          | -           | 98.7             | 96.7   | 90.1        | 100.8  | 94.4                          | 91.1  | 94.7  | 96.6  |
| FSZ      | -                          | -           | 77.4             | 76.7   | 76.9        | 96.1   | 75.1                          | 83.2  | 83.1  | 82.7  |
| PCZ      | -                          | -           | 84.2             | 85.2   | 78.8        | 93.8   | 82.9                          | 96.4  | 77.2  | 84.9  |
| TCZ      | -                          | -           | 88.1             | 90.9   | 85.9        | 103.6  | 83.7                          | 87.5  | 86.0  | 92.4  |
| ICP      | 100.7                      | 112.0       | 94.3             | 98.5   | 93.8        | 102.8  | 96.4                          | 96.2  | 112.0 | 103.1 |
| AMP      | 127.9                      | 101.6       | 92.4             | 96.8   | 88.7        | 102.4  | 96.4                          | 96.8  | 107.3 | 99.0  |
| DMA      | 113.0                      | 106.6       | 85.9             | 87.0   | 87.6        | 101.2  | 96.0                          | 99.1  | 104.6 | 101.0 |

<sup>a</sup> Italic letters in the table represent surrogate;

<sup>b</sup> Bold letters in the table represent those recoveries outside the range of 40%–130%;

<sup>c</sup> Not spiked;

<sup>d</sup> Not analysis

Table S3 Matrix effects and comparison of two quantification methods

| Compound                   | ME (%) | Recovery (%)                |                          |
|----------------------------|--------|-----------------------------|--------------------------|
|                            |        | Method of internal standard | Method of matrix-matched |
| <i>SDZ-D4</i> <sup>a</sup> | 67.7   | 70.2                        | 78.0                     |
| <i>STZ-D4</i>              | 61.7   | 61.3                        | 79.2                     |
| <i>NOR-D5</i>              | 60.0   | 67.7                        | 58.0                     |
| <i>SCZ</i>                 | 84.6   | <b>147.6</b> <sup>b</sup>   | 101.0                    |
| <i>SMOZ</i>                | 60.1   | 96.9                        | 83.2                     |
| <i>SMTZ</i>                | 65.5   | 108.3                       | 73.3                     |
| <i>SPD</i>                 | 42.7   | 57.7                        | 77.3                     |
| <i>STZ</i>                 | 54.5   | 98.4                        | 75.0                     |
| <i>SQA</i>                 | 45.6   | 38.5                        | 73.1                     |
| <i>SCPZ</i>                | 67.6   | 80.1                        | 81.5                     |
| <i>SMZ</i>                 | 37.3   | 64.5                        | 80.7                     |
| <i>SDMX</i>                | 43.9   | 53.1                        | 82.3                     |
| <i>SMMX</i>                | 74.6   | 81.7                        | 81.4                     |
| <i>SMT</i>                 | 48.2   | 67.5                        | 71.5                     |
| <i>SMA</i>                 | 45.4   | 79.6                        | 81.4                     |
| <i>SDZ</i>                 | 57.8   | 80.6                        | 77.1                     |
| <i>SMD</i>                 | 63.9   | 45.5                        | 55.0                     |
| <i>SXZ</i>                 | 64.6   | 69.9                        | 81.4                     |
| <i>SNT</i>                 | 47.5   | <b>157.6</b>                | 102.6                    |
| <i>SMPZ</i>                | 48.1   | 77.8                        | 71.7                     |
| <i>CIP</i>                 | 53.0   | 92.7                        | 52.9                     |
| <i>NOR</i>                 | 62.2   | 95.9                        | 55.8                     |
| <i>ENR</i>                 | 66.4   | 82.9                        | 47.8                     |
| <i>OFX</i>                 | 51.8   | 72.8                        | 55.0                     |
| <i>DFX</i>                 | 62.0   | 87.6                        | 53.8                     |
| <i>FLQ</i>                 | 66.5   | 119.5                       | 88.3                     |
| <i>MFX</i>                 | 47.2   | 72.2                        | 46.5                     |
| <i>SFX</i>                 | 63.3   | 105.9                       | 57.3                     |
| <i>OA</i>                  | 48.8   | 89.1                        | 77.8                     |
| <i>ETM</i>                 | 45.5   | 73.3                        | 89.0                     |
| <i>TLS</i>                 | 98.5   | <b>135.6</b>                | 82.5                     |
| <i>TMS</i>                 | 89.3   | <b>177.6</b>                | 73.0                     |
| <i>OTC</i>                 | 294.4  | <b>614.3</b>                | 72.4                     |
| <i>CTC</i>                 | 257.5  | <b>804.0</b>                | 85.9                     |
| <i>TCC</i>                 | 156.7  | <b>459.1</b>                | 73.4                     |
| <i>DCC</i>                 | 275.0  | <b>614.0</b>                | 82.2                     |
| <i>PCA</i>                 | 61.4   | 52.6                        | 86.5                     |
| <i>DCZ</i>                 | 78.5   | 49.5                        | 73.9                     |
| <i>TMF</i>                 | 81.0   | 94.6                        | 100.0                    |
| <i>TMN</i>                 | 56.5   | 68.6                        | 101.9                    |
| <i>PBZ</i>                 | 75.0   | 96.5                        | 100.2                    |
| <i>MCB</i>                 | 75.6   | 99.5                        | 99.2                     |
| <i>FSZ</i>                 | 75.9   | 75.6                        | 87.1                     |
| <i>PCZ</i>                 | 82.9   | 100.9                       | 91.6                     |
| <i>TCZ</i>                 | 80.1   | 100.8                       | 94.8                     |
| <i>ICP</i>                 | 68.4   | 105.8                       | 97.4                     |
| <i>AMP</i>                 | 53.2   | 119.4                       | 97.8                     |
| <i>DMA</i>                 | 42.1   | 87.8                        | 100.3                    |

<sup>a</sup> Italic letters in the table represent surrogate;

<sup>b</sup> Bold letters in the table represent those recoveries outside the range of 40%–130%



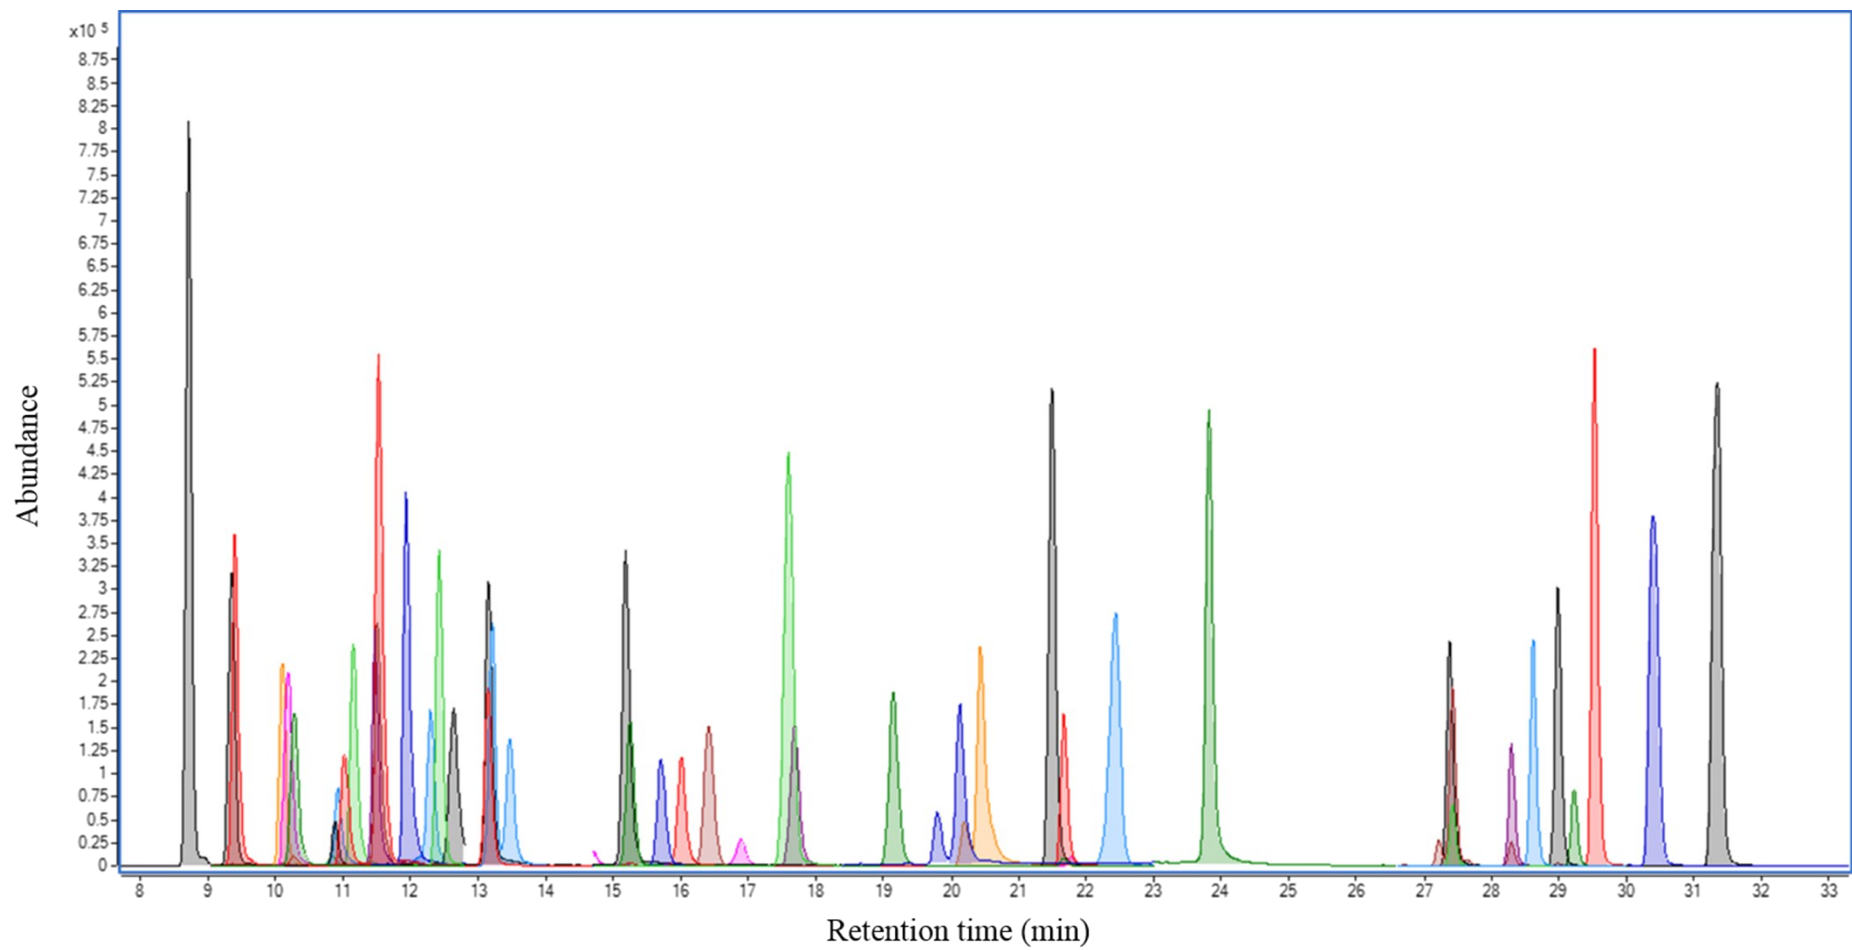

Figure S1 MRM chromatogram of target compounds and surrogates spiked in sediment extracts ( $50 \text{ ng} \cdot \text{mL}^{-1}$ )

## References

- 1 L.J. Zhou, G.G. Ying, S. Liu, J.L. Zhao, F. Chen, R.Q. Zhang, F.Q. Peng and Q.Q. Zhang, *J. Chromatogr. A*, 2012, 1244, 123-138.
- 2 E. Chamberlain and C. Adams, *Water Res.*, 2006, 40, 2517-2526.
- 3 K. Chen and J.L. Zhou, *Chemosphere*, 2014, 95, 604-612.
- 4 S.F. Yang, C.F. Lin, A.Y.C. Lin and P.K. A. Hong, *Water Res.*, 2011, 45, 3389-3397.
- 5 T. Li, Z.G. Shi, M.M. Zheng and Y.Q. Feng, *J. Chromatogr. A*, 2008, 1205, 163-170.
- 6 X. Van Doorslaer, J. Dewulf, H. Van Langenhove and K. Demeestere, *Sci.Total Environ.*, 2014, 500–501, 250-269.
